# Supplementary material
Source: PubMed Central journal article supplement (PMC3061281)

Type of file: figure

Label: 7

Filename: Wu\_et\_al.\_Figure\_I\_Data\_Supplement.tif

**A**

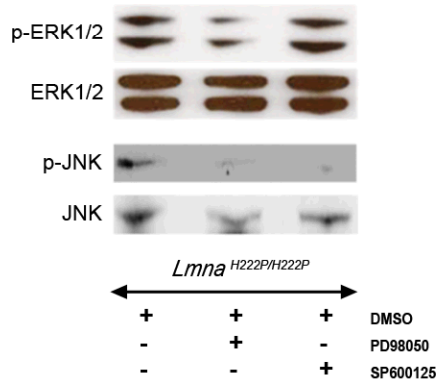

**B**

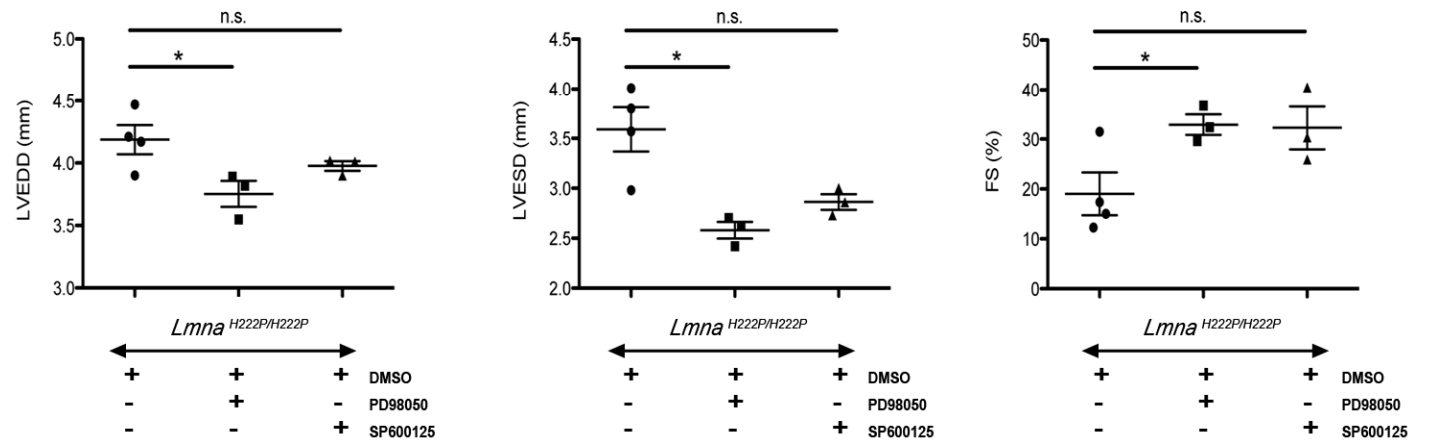

**C**

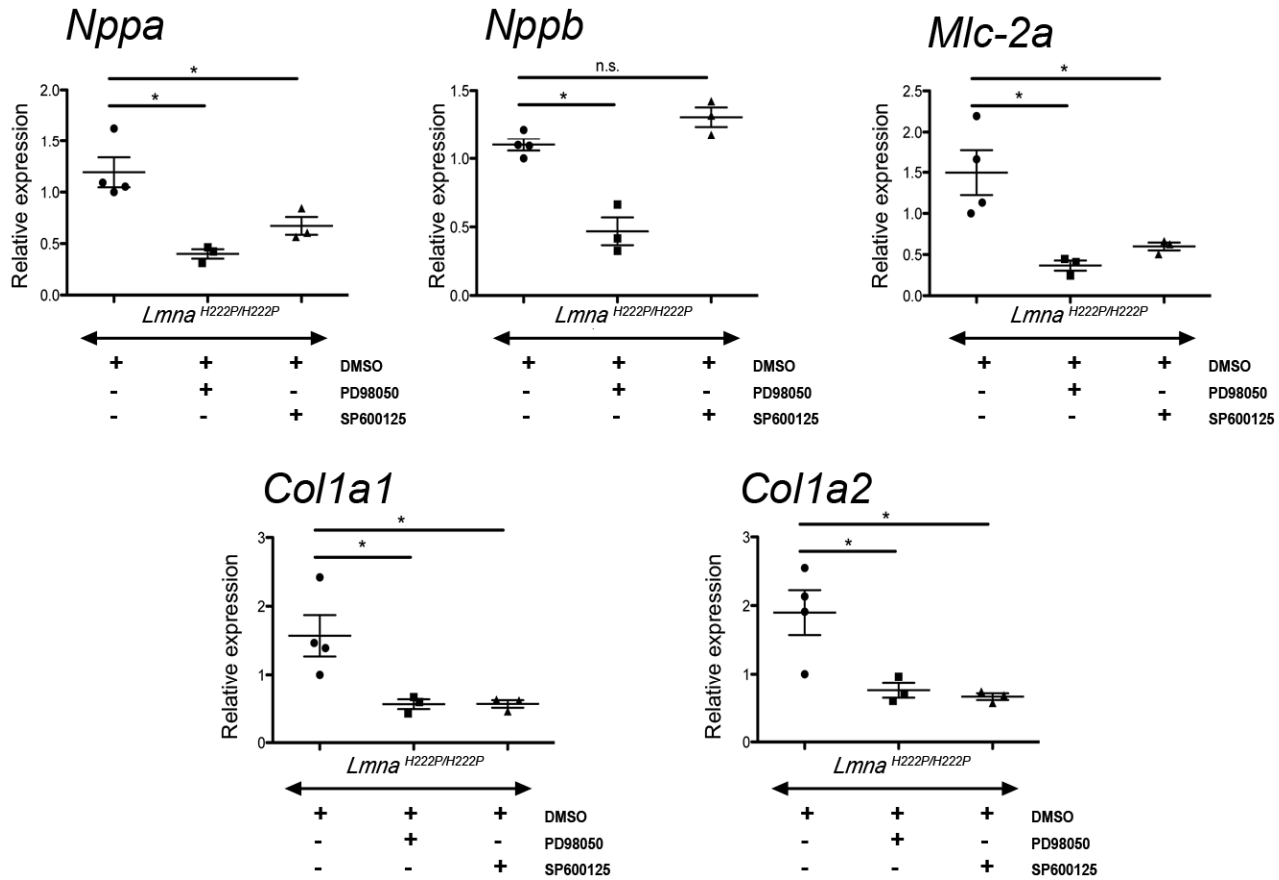

Supplement: NIHMS259699-supplement-supplement_1.pdf [file NIHMS259699-supplement-supplement_1.pdf]
